# Supplementary figures and images for: pH-Sensitive mesoporous zirconium diphosphonates for controllable colon-targeted delivery
Source: Royal Society of Chemistry journal article supplement (doi:10.1039/c0jm00587h), 2010-01-01

## Supporting Information Available

**Figure S1.** SEM images of ZrBPMP-n ( $n = 1, 3, 5$  and  $7$ ).

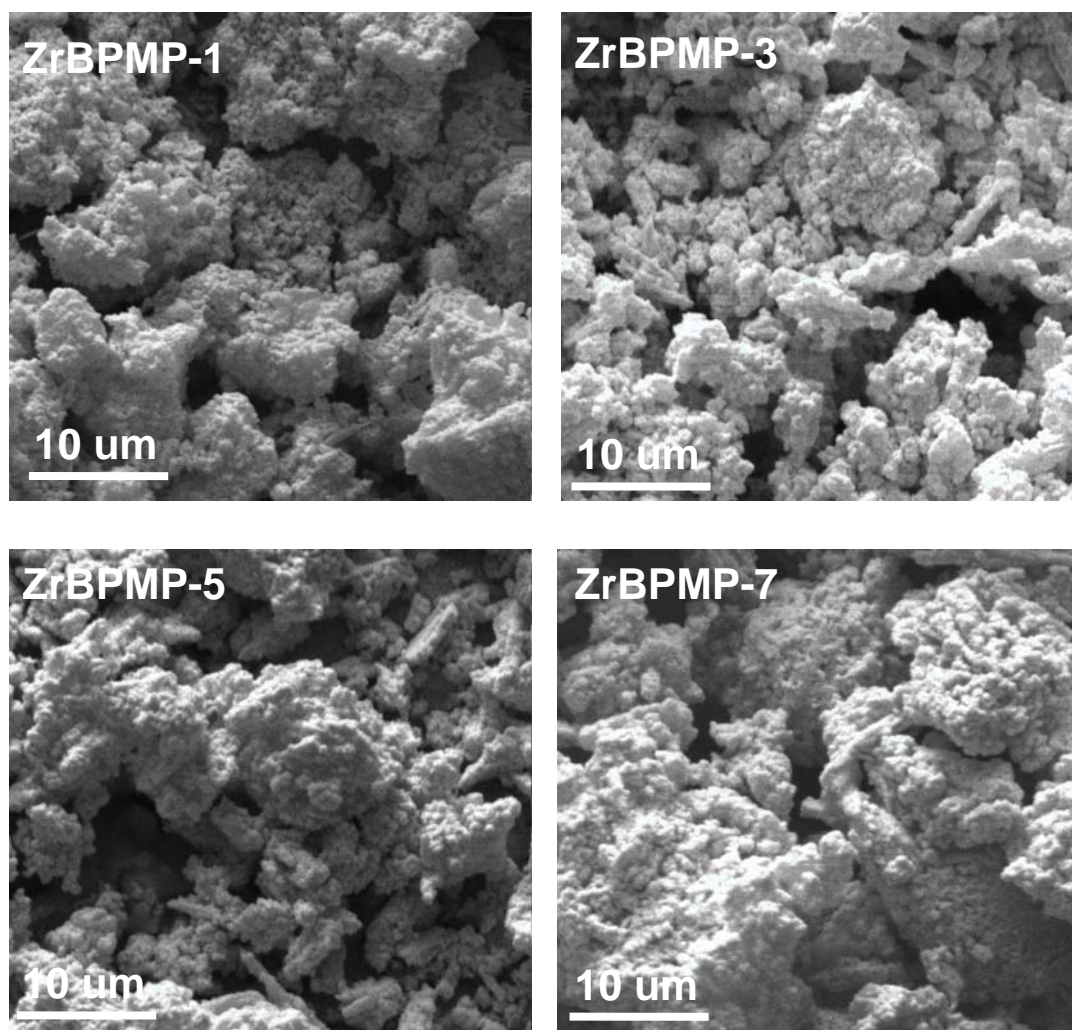

**Figure S1**

Supplement: c0jm00587h.pdf [file c0jm00587h.pdf]
